# Supplementary material
Source: Springer Nature journal article supplement (https://www.springermedizin.de/resource/supplementary/12913_2012_2334_MOESM3_ESM.pdf/9529584)

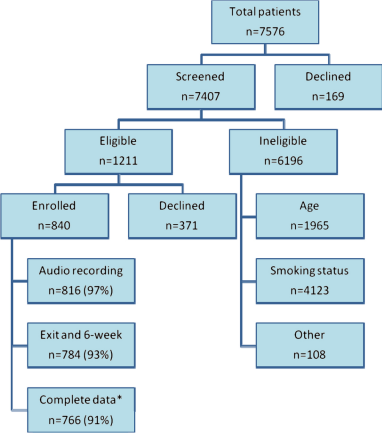

Supplement: MOESM3 [file 9529584]
